1 **Perception of environmental polypeptides in *C. elegans* activates insulin/IGF signaling**  
2 **and alters lipid metabolism**

3  
4  
5 Rebecca E. W. Kaplan<sup>1</sup>, Amy K. Webster<sup>1</sup>, Rojin Chitrakar<sup>1</sup>, Joseph A. Dent<sup>2</sup>, and L. Ryan  
6 Baugh<sup>1\*</sup>

7 <sup>1</sup>Department of Biology, Duke University, Durham, NC 27708, USA

8 <sup>2</sup>Department of Biology, McGill University, Montreal, QC, H3A 1B1

9  
10  
11

12 \*Corresponding author, L. Ryan Baugh

13 Department of Biology

14 Duke University

15 Box 90338

16 Durham, NC 27708-0338

17 Phone: 919-613-8179

18 E-mail: [ryan.baugh@duke.edu](mailto:ryan.baugh@duke.edu)

19 **Abstract**

20 Food perception affects animal physiology in complex ways. We uncoupled the effects of food  
21 perception and ingestion in the roundworm *C. elegans*. Perception was not sufficient to promote  
22 development, but larvae exposed to food without ingestion failed to develop upon return to  
23 normal culture conditions. Inhibition of gene expression during perception rescued subsequent  
24 development, demonstrating the response to perception without feeding is deleterious.  
25 Perception altered DAF-16/FOXO localization, reflecting activation of insulin/IGF signaling (IIS).  
26 The insulin-like peptide *daf-28* was specifically required, suggesting perception in  
27 chemosensory neurons directly regulates peptide secretion. Gene expression and Nile Red  
28 staining suggest that perception alters lipid metabolism. Environmental polypeptides are sensed  
29 by starved larvae and promote dauer diapause recovery. We conclude that polypeptides are  
30 perceived as a food-associated cue, initiating a signaling and gene regulatory cascade that  
31 alters metabolism in anticipation of feeding and development, but that this response is  
32 detrimental if feeding does not occur.

### 33 Introduction

34 Perception of food affects metabolism and development in a variety of animals. Several  
35 observations suggest that sensory perception of food can regulate metabolism. For example,  
36 humans release insulin in response to the sight and smell of food (Sjostrom, Garellick et al.  
37 1980). In mice loss of olfactory neurons reduces obesity and insulin resistance, and enhancing  
38 olfactory acuity does the reverse (Riera, Tsaousidou et al. 2017). Blocking olfaction in  
39 *Drosophila* alters metabolism and extends lifespan; conversely, the longevity-extending effects  
40 of dietary restriction are partially reversed by exposure to food odors (Libert, Zwiener et al.  
41 2007). Likewise, in *C. elegans* sensory perception affects lifespan and development of dauer  
42 larvae, a form of diapause in the third larval stage (Apfeld and Kenyon 1999, Alcedo and  
43 Kenyon 2004, Hu 2007, Lans and Jansen 2007). However, the molecular cues that are sensed  
44 and their specific effects on organismal signaling and gene regulation are not well understood in  
45 any system.

46 *C. elegans* L1-stage larvae hatch in a state of developmental arrest ("L1 arrest" or "L1  
47 diapause") and require food to initiate development (Baugh 2013). IIS is a key regulator of L1  
48 arrest (Baugh and Sternberg 2006, Fukuyama, Rougvie et al. 2006). During starvation, *daf*-  
49 *16*/FOXO promotes L1 arrest by inhibiting development-promoting pathways (Baugh and  
50 Sternberg 2006, Kaplan, Chen et al. 2015). Feeding up-regulates activity of the insulin-like  
51 peptides *daf-28*, *ins-6*, and *ins-4*, among others, which act as agonists for the only known  
52 insulin/IGF receptor *daf-2* (Chen and Baugh 2014). *daf-2*/InsR signaling activates a conserved  
53 phosphoinositide 3-kinase (PI3K) cascade to antagonize DAF-16 and promote development  
54 (Morris, Tissenbaum et al. 1996, Lin, Dorman et al. 1997, Ogg, Paradis et al. 1997, Kimura,  
55 Riddle et al. 2011). *daf-28*, *ins-6*, and *ins-4* are also critical to regulation of dauer development  
56 (Li, Kennedy et al. 2003, Cornils, Gloeck et al. 2011), which together with their role in regulating  
57 L1 development, indicates that they are atop the organismal regulatory network governing

58 postembryonic development. However, how these important insulin-like peptides are regulated  
59 in response to nutrient availability is unknown.

60 Feeding in *C. elegans* is mediated by pumping of the neuromuscular organ called the  
61 pharynx (Avery and You 2012). The drug ivermectin paralyzes the pharynx by activating  
62 glutamate-gated chloride channels containing  $\alpha$ -type channel subunits, increasing chloride  
63 conductance and inhibiting cellular depolarization (Avery and Horvitz 1990, Cully, Vassilatis et  
64 al. 1994, Dent, Davis et al. 1997, Vassilatis, Arena et al. 1997). Several genes encoding  
65 glutamate-gated chloride channels in *C. elegans* confer sensitivity to ivermectin, but  
66 simultaneous mutation of three or more of these genes produces substantial ivermectin  
67 resistance (Dent, Smith et al. 2000).

68 Here we used ivermectin to prevent feeding in worms exposed to food. We show that  
69 perception of food without ingestion significantly alters gene expression and activates IIS but is  
70 not sufficient to initiate development. To the contrary, perception without ingestion makes  
71 developmental arrest irreversible. We show that starved worms sense polypeptides in their  
72 environment as a food cue, likely in anticipation of feeding.

73

## 74 **Results**

### 75 Perception of food without ingestion renders developmental arrest irreversible

76 We used ivermectin to prevent feeding in order to uncouple the effects of food  
77 perception from ingestion. We wanted to limit effects of the drug outside the pharynx, so we  
78 started with a highly ivermectin-resistant strain, the quadruple mutant *avr-14(vu47); glc-*  
79 *3(ok321) avr-15(vu227) glc-1(pk54)*, and rescued *avr-15* with a *myo-2* promoter for pharynx-  
80 specific expression. We made two versions of the strain with two different markers for analysis  
81 of development: *AJM-1::GFP* to examine seam cells and *Phlh-8::GFP* to examine the M-cell  
82 lineage.

83           Throughout this study, most experiments follow the basic setup seen in Fig. 1A. We  
84 prepared embryos by hypochlorite treatment and cultured them in either ivermectin or control  
85 (DMSO) conditions without food for 24 hr so they hatch and enter L1 arrest. Various types of  
86 food or other substances were then added, and worms were typically analyzed 1 hr or 24 hr  
87 after this addition. To determine if ingestion was occurring, GFP beads were added to the  
88 cultures and worms were examined. Critically, GFP beads were not ingested in the ivermectin  
89 plus food (*E. coli* HB101) conditions (Supp. Fig. 1A). For initial characterization of the effects of  
90 food perception without ingestion, worms were plated in standard laboratory conditions (on  
91 plates with *E. coli* OP50 but no ivermectin) after 24 hr of exposure to experimental conditions  
92 and allowed to recover for three days. Worms exposed to ivermectin plus food failed to recover,  
93 remaining arrested in the L1 stage, while the controls recovered completely (Fig. 1B). That is,  
94 ivermectin treatment alone did not cause an irreversible arrest, but ivermectin plus food did.  
95 This striking phenotype was further characterized with a time series, revealing a near complete  
96 effect by about 8 hr (Fig. 1C). Recovery to the L4 stage was chosen as an easy stage to reliably  
97 score. Though 24 hr exposure generally rendered larvae capable of negligible if any growth,  
98 earlier time points associated with incomplete penetrance were associated with intermediate  
99 growth rates as well. Worms displayed significant failure to recover with as little as 1 mg/mL  
100 HB101 (Supp. Fig. 1B), and worms were at least as sensitive to *E. coli* OP50 and HT115 (Supp.  
101 Fig. 1C). Together these results reveal a potent effect of exposure to *E. coli* without feeding on  
102 the ability of larvae to recover from starvation-induced developmental arrest.

103           Feeding causes a significant change in transcription and translation in *C. elegans* L1  
104 larvae (Baugh, Demodena et al. 2009, Maxwell, Antoshechkin et al. 2012, Stadler and Fire  
105 2013). We hypothesized that food perception evokes a gene expression response that is  
106 deleterious without feeding. Worms were treated with the drug  $\alpha$ -amanitin, which inhibits  
107 transcription (Sanford, Golomb et al. 1983, McColl, Rogers et al. 2010, Zaslaver, Baugh et al.  
108 2011), slightly before and during food exposure. Blocking transcription significantly increased

109 recovery (Fig. 1D). As a complementary approach, worms were treated with cycloheximide to  
110 block translation (McColl, Rogers et al. 2010) in a similar manner. This treatment also  
111 significantly improved recovery (Fig. 1E). Together these results suggest that food perception  
112 alters gene expression, and that this change in expression affects the animal adversely if it is  
113 not accompanied by feeding.

114

#### 115 Food perception evokes a gene expression response similar to feeding

116 We performed mRNA-seq to characterize the effects of food perception on gene  
117 expression. We assayed larvae that were exposed to ivermectin and food for 1 hr or 24 hr to  
118 distinguish relatively immediate and long-term effects, and we assayed larvae exposed to  
119 ivermectin without food at the same time points for reference, as well as larvae that were fed or  
120 starved without ivermectin for 1 hr (a 24 hr time point was not included since the fed larvae  
121 would have developed to the L3 stage). Principal component analysis revealed a large effect of  
122 ivermectin, with ivermectin treatment correlating with the first component (Supp. Fig. 2). Feeding  
123 significantly affected mRNA expression, as expected, and the second and third principal  
124 components separated the fed and starved worms (Fig. 2A). Notably, worms exposed to  
125 ivermectin and food for 1 hr were different from worms starved with ivermectin, falling closer to  
126 fed worms on the graph. However, by 24 hr of exposure to ivermectin and food the expression  
127 profile was not significantly different from its starved control. Likewise, 1,258 genes were  
128 differentially expressed at 1 hr comparing ivermectin with food to ivermectin starved, but only  
129 241 genes were differentially expressed in the same comparison at 24 hr (false discovery rate  
130 (FDR) < 0.05 and an absolute  $\log_2$  fold change of greater than 0.5; S1 Dataset). These results  
131 show that perception of food alters gene expression initially but that this effect subsides over  
132 time.

133 We wondered how well correlated the gene expression response to food perception is  
134 with feeding. The magnitude of the feeding response was larger, with 5,551 differentially

135 expressed genes at 1 hr compared to 1,258 genes in the presence of ivermectin. These gene  
136 expression changes were very well correlated, with 98.8% of genes differentially expressed in  
137 both conditions changing in the same direction (Fig. 2B). Indeed, the vast majority of genes  
138 affected by food with ivermectin were also affected by feeding (Fig. 2D, hypergeometric p-value  
139 =  $6.8e-353$ ). These results indicate that perception of food evokes a similar, though reduced,  
140 gene expression response to feeding. The response to food in the presence of ivermectin at 1  
141 hr and 24 hr was also well correlated, with 91.9% of genes differentially expressed at both times  
142 responding in the same direction (Fig. 2C). Indeed, there was significant overlap in the  
143 differentially expressed genes at both time points (Fig. 2D, hypergeometric p-value =  $3.7e-60$ ).  
144 These results support the conclusion that perception of food initially alters gene expression in a  
145 way that resembles the feeding response, but that this response to perception diminishes  
146 over time.

147         As an effector of IIS, *daf-16*/FOXO is an important regulator of gene expression during  
148 L1 starvation (Kaplan, Chen et al. 2015, Hibshman, Doan et al. 2017). Since DAF-16 is  
149 inactivated by IIS in response to feeding, we hypothesized that it is also inactivated by  
150 perception of food, contributing to the resulting gene expression response. A previous study  
151 identified 1,572 genes differentially expressed in a *daf-16* null mutant compared to wild type  
152 during L1 starvation (Kaplan, Chen et al. 2015). These differences in gene expression  
153 correlated with the effect of food in the presence of ivermectin at 1 hr, with 88.4% of the genes  
154 significantly affected in both comparisons responding in the same direction (Fig. 2E). There was  
155 also significant overlap in the genes affected in both comparisons (Fig. 2F, hypergeometric p-  
156 value =  $2.5e-98$ ). These results suggest that perception of food in starved larvae reduces *daf-*  
157 *16*/FOXO activity.

158

159 Perception of food activates insulin/IGF signaling

160 Similarity in the gene expression responses of wild-type worms exposed to food in the  
161 presence of ivermectin and a starved *daf-16*/FOXO mutant suggest that perception of food  
162 activates IIS. Since IIS regulates subcellular localization of DAF-16 (Henderson and Johnson  
163 2001), perception of food should affect localization if this hypothesis is correct. We categorized  
164 GFP::DAF-16 localization as nuclear, intermediate, or cytoplasmic (Fig. 3A). As expected,  
165 GFP::DAF-16 was primarily nuclear during starvation and primarily cytoplasmic after 1 hr of  
166 exposure to food (Fig. 3B). One hour exposure to food with ivermectin also significantly shifted  
167 GFP::DAF-16 to the cytoplasm, supporting our hypothesis that perception of food activates IIS.  
168 However, after 24 hr there was no difference between ivermectin fed and ivermectin starved  
169 worms. Similar to mRNA-seq results at 1 hr and 24 hr, this result suggests that perception of  
170 food is sufficient to shift DAF-16 localization initially but not to maintain it. GFP::DAF-16  
171 localization also responds to other bacterial strains in the presence of ivermectin (Supp. Fig.  
172 3A). These results suggest that perception of each of the bacteria used as food in the lab can  
173 activate IIS.

174 The insulin-like peptides *daf-28*, *ins-4*, *ins-5* and *ins-6* are transcriptionally up-regulated  
175 by feeding L1 larvae, and they promote L1 development (Chen and Baugh 2014). We found that  
176 *daf-28*, *ins-5*, and *ins-6* transcripts were significantly up-regulated after 1 hr exposure to food in  
177 the presence of ivermectin (Fig. 3C). The COPAS BioSorter was used to quantify whole-worm  
178 fluorescence of a *Pdaf-28::GFP* transcriptional reporter, supporting the conclusion that *daf-28*  
179 transcription increases in response to food perception (Fig. 3D). This reporter was expressed in  
180 anterior neurons and the posterior intestine with brighter expression after 6 hr feeding (Fig. 3E),  
181 as expected (Chen and Baugh 2014). Consistent with the COPAS result and mRNA-seq, it was  
182 also brighter after exposure to food in the presence of ivermectin. These results reveal  
183 transcriptional up-regulation of *daf-2*/InsR agonists as an initial response to perception of food,  
184 consistent with activation of IIS.



185           The *C. elegans* genome encodes 40 insulin-like peptides, and many of them are  
186 functionally redundant, making it difficult to detect mutant phenotypes (Pierce, Costa et al.  
187 2001). As a control, mutation of *daf-2/InsR* completely blocked the effects of food on GFP::*DAF-*  
188 *16* localization (Supp. Fig. 3B). *ins-4, 5* and *6* are clustered on chromosome II, so we analyzed  
189 a deletion allele that removes all three (Hung, Wang et al. 2014), combining it with a *daf-28*  
190 deletion allele to simultaneously disrupt all four. The compound mutant retained the response to  
191 feeding, but the change in localization of GFP::*DAF-16* in response to food in the presence of  
192 ivermectin was significantly reduced (Fig. 3F). A *daf-28* deletion alone mimicked the behavior of  
193 the compound mutant, but the *ins-4, 5, 6* deletion alone did not, suggesting *daf-28* specifically  
194 mediates the response to food perception. To examine this closer, we plotted the data for wild  
195 type and the *daf-28* mutant separately, focusing on the effect of food in the presence and  
196 absence of ivermectin (Fig. 3G). These data show a specific effect of *daf-28* on the response to  
197 food in the presence of ivermectin (two-way ANOVA p-values for interaction between genotype  
198 and presence or absence of ivermectin: *daf-28* = 0.03, *ins-4, 5, 6; daf-28* = 0.02, *ins-4, 5, 6* =  
199 0.29). These data suggest that *daf-28* plays a critical role in mediating the initial response to  
200 food perception on IIS activity, and they suggest that overlapping function of insulin-like  
201 peptides provides a more robust response to feeding than perception alone.

202           We hypothesized that perception of food promotes secretion of *DAF-28* and other  
203 insulin-like peptides from chemosensory neurons, providing a rapid response to environmental  
204 conditions. To test this hypothesis, we treated worms with cycloheximide to block translation  
205 and examined GFP::*DAF-16* localization. Localization was significantly more cytoplasmic in  
206 response to food in the presence of ivermectin when treated with cycloheximide (Fig. 3H),  
207 consistent with perception of food directly promoting secretion of insulin-like peptides. However,  
208 the shift in GFP::*DAF-16* localization appeared incomplete with cycloheximide treatment.  
209 Together with our results showing an effect on *daf-28* transcription, this observation suggests  
210 that food perception affects insulin-like peptide activity at multiple levels of regulation.

211           Given the effects of food perception on IIS, we hypothesized that IIS mutants affect the  
212 irreversible arrest resulting from perception without feeding. However, neither *daf-2/InsR* nor  
213 *daf-16/FOXO* mutants had increased recovery after exposure to food in the presence of  
214 ivermectin (Fig. 3H). If cytoplasmic localization of DAF-16 during starvation was sufficient to  
215 cause the irreversible arrest phenotype, then *daf-16* mutants should not be able to recover  
216 following starvation. *daf-16* mutants are starvation-sensitive, but they nonetheless can be  
217 starved and retain the ability to recover upon feeding (Fig. 3I). In conclusion, the irreversible  
218 arrest is likely caused by alteration of multiple pathways such that activation of IIS alone during  
219 starvation is not sufficient.

220

#### 221 Perception of food is not sufficient to promote development

222           We used Gene Ontology (GO) term enrichment analysis of our mRNA-seq results to get  
223 a broad view of the processes affected by perception of food. The response to feeding for 1 hr  
224 revealed significant overlap with metabolism genes (hypergeometric p-value = 8.6e-92) and  
225 larval development genes (Fig. 4A, hypergeometric p-value = 9.8e-39). The response to food  
226 exposure for 1 hr in the presence of ivermectin also revealed overlap with metabolism genes  
227 (Fig. 4B, hypergeometric p-value = 5.0e-23) but not with larval development genes  
228 (hypergeometric p-value = 0.89). Furthermore, genes differentially expressed in response to  
229 food exposure in the presence of ivermectin but not feeding were enriched for lipid metabolic  
230 terms, while genes differentially expressed in response to feeding but not exposure to food in  
231 the presence of ivermectin were enriched for a variety of terms related to development (Supp.  
232 Fig. 4A-C, S1 Dataset). These results suggest that perception of food affects lipid metabolism  
233 but not development.

234           The lateral epidermal seam cells are the first cells to divide in developing L1 larvae  
235 (Sulston and Horvitz 1977), and they divide very rarely during L1 arrest (Baugh and Sternberg  
236 2006, Kaplan, Chen et al. 2015). We used an AJM-1::GFP reporter for adherens junctions to

237 visualize seam cell membranes and count divisions of the cells v1-6 (Gupta, Wang et al. 2003).  
238 Consistent with the results of GO term analysis, exposure to food for two days in the presence  
239 of ivermectin did not cause seam cell divisions (Fig. 4C). There were also no M-cell divisions  
240 (data not shown). These results with the most stringent assay available indicate that perception  
241 of food is not sufficient to promote detectable postembryonic development.

242

#### 243 Perception of food alters lipid metabolism

244 GO term enrichments suggest that lipid metabolism is affected by perception of food.  
245 Consistent with this hypothesis, differential interference contrast microscopy revealed numerous  
246 droplets throughout the body and around the pharynx after prolonged exposure to food in the  
247 presence of ivermectin (Fig. 4D). Given their appearance and GO term enrichments (Supp. Fig.  
248 4A), we hypothesized that these are lipid droplets. Nile red staining of fixed L1 larvae supported  
249 this hypothesis (Fig. 4D). Starved L1 larvae, either shortly after hatching or 24 hr later, did not  
250 contain such fat droplets. Fed L1 larvae developed small fat droplets in what appeared to be the  
251 intestine, while the droplets in worms exposed to food and ivermectin for 24 hr were more varied  
252 in size and location. Cycloheximide treatment significantly reduced the number of fat droplets  
253 (Fig. 4E). We conclude that the gene expression response to food perception alters lipid  
254 metabolism, resulting in abnormal accumulation of lipid droplets in the body cavity.

255

#### 256 Polypeptides serve as an environmental cue for food

257 Worms rely on mechanosensory and chemosensory cues to regulate locomotion,  
258 development, pathogen avoidance, feeding, and mating (Bargmann 2006, Goodman 2006).  
259 Worms respond to mechanosensory stimulus when encountering a bacterial lawn, which can be  
260 mimicked with Sephadex beads (Sawin, Ranganathan et al. 2000). To test whether the effects  
261 of food perception were due to mechanosensation or chemosensation, we assayed the ability to  
262 recover after starvation in the presence of ivermectin and Sephadex beads or HB101 bacterial

263 filtrate, respectively. We found that Sephadex beads did not affect starvation recovery, while  
264 HB101 filtrate prevented recovery as strongly as HB101 itself (Fig. 5A, Supp. Fig. 1A). These  
265 data suggest that the deleterious effect of food perception without ingestion is via  
266 chemosensation and not mechanosensation.

267         Since the relevant modality of perception appeared to be chemosensory, we wanted to  
268 identify a molecular component of bacterial food that functions as an environmental cue for the  
269 worm. We found that LB medium, a common nutrient broth for culturing *E. coli*, as well as its  
270 components, yeast extract and tryptone, caused irreversible arrest in worms exposed to them in  
271 the presence of ivermectin, similar to the effect of HB101 (Fig. 5B). Yeast extract results from  
272 autolysis of *S. cerevisiae* and contains a complicated mixture of amino acids, peptides,  
273 carbohydrates, and vitamins. Tryptone is a tryptic digest of the protein casein, resulting in  
274 polypeptides of varying lengths. Since tryptone is much simpler than yeast extract, we decided  
275 to focus our investigation there. We tested undigested casein and casamino acids, which is  
276 casein that has been through acid hydrolysis to produce free amino acids. We also tested  
277 bovine serum albumin (BSA) as another form of protein. We found that casein and BSA  
278 significantly prevented recovery while casamino acids did not (Fig. 5B). Since casamino acids  
279 do not contain polypeptide, these results suggest polypeptide is perceived. We also tested a  
280 solution of the ten essential amino acids for *C. elegans*, ethanol, glucose, and a combination of  
281 all three, and found that none of these significantly affected recovery (Supp. Fig. 5A).  
282 Perception of polypeptides and other potential food cues also caused GFP::DAF-16 to  
283 translocate to the cytoplasm (Supp, Fig. 5B,C). When otherwise starved larvae were permitted  
284 to ingest polypeptide or other potential cues, they supported survival (Supp. Fig. 5D) but not  
285 development (based on the M-cell division assay; data not shown), as if providing an incomplete  
286 source of nutrition. This treatment also compromised the ability of larvae to subsequently  
287 recover in standard culture conditions (Supp. Fig. 5E,F), reminiscent of the effect of exposure to

288 food in the presence of ivermectin. In summary, we conclude that starved worms perceive  
289 polypeptides, as if they are a food-associated cue, though other cues may also be involved.

290 We wanted an alternative and more ecologically relevant approach than using ivermectin  
291 to determine if starved worms perceive polypeptide. Dauer larvae have an internal plug blocking  
292 the pharynx and do not pump (Cassada and Russell 1975, Riddle, Swanson et al. 1981).  
293 Tryptone and LB promoted dauer recovery, as did HB101, while casamino acids and the buffer  
294 S-complete did not (Fig. 5C). These results further support the conclusion that *C. elegans*  
295 perceive environmental polypeptides when starved as a food-associated cue, and they suggest  
296 that such perception provides an important regulatory input for dauer recovery.

297

## 298 Discussion

299 We sought to uncouple the effects of food perception and ingestion on *C. elegans*  
300 development, gene expression and metabolism. We report that perception is not sufficient to  
301 promote development, but that it activates IIS and alters gene expression and lipid metabolism.  
302 We also report that starved larvae sense environmental polypeptides, as if worms use them as  
303 a food-associated cue to anticipate feeding and development.

304 The most striking phenotype we report is the irreversible developmental arrest of larvae  
305 that are starved in the presence of food, so that they perceive food without eating it. Ivermectin  
306 binding has been characterized as irreversible (Cully, Vassilatis et al. 1994, Vassilatis, Arena et  
307 al. 1997, Horoszok, Raymond et al. 2001). These studies involved very different time scales  
308 from ours, and they used ivermectin doses 50-100-fold greater than us. Nonetheless, we  
309 considered irreversible binding as an explanation for irreversible arrest, but several lines of  
310 evidence suggest otherwise. Worms exposed to the relatively low dose of ivermectin we used  
311 without food almost completely recover. Also, recovery was rescued by blocking transcription or  
312 translation. In addition, we see a similar reduction in recovery rate in otherwise starved L1  
313 larvae exposed to food cues. This observation along with the effect of ivermectin and food

314 suggest that perception of food cues without ingestion of complete nutrition underlies the  
315 irreversible arrest phenotype. We speculate that perception of food alters metabolism to prime  
316 the animal for feeding and development, but that the changes that occur are detrimental if not  
317 accompanied by feeding.

318 We present evidence that food perception elicits a gene expression response that is  
319 largely subsumed by the feeding response, and that this response is in part due to activation of  
320 IIS. Notably, the gene expression response and activation of IIS were relatively transient, as if  
321 larvae initially respond to food perception but this response is not maintained without feeding  
322 and ingestion of nutrients. We imagine that the transient nature of this response is due to  
323 habituation of perception or antagonism from internal starvation signals, or a combination of the  
324 two. Up-regulation of IIS during L1 starvation promotes cell division (Chen and Baugh 2014), but  
325 perception of food did not, though IIS was activated. We believe the transient nature of IIS  
326 activation by food perception explains the lack of postembryonic development. Despite the  
327 transient nature of the responses to food perception, they nonetheless have physiological  
328 consequences as demonstrated by accumulation of lipid droplets and irreversibility of  
329 developmental arrest.

330 Insulin-like peptides *daf-28*, *ins-6* and *ins-4* govern postembryonic development, and  
331 their transcription is positively regulated by nutrient availability (Li, Kennedy et al. 2003, Cornils,  
332 Gloeck et al. 2011, Chen and Baugh 2014). We show that *daf-28* transcription is up-regulated  
333 by perception of food, and that it plays a specific role in activating IIS in response to perception.  
334 That is, *daf-28* was specifically required for food perception to cause GFP::DAF-16 translocation  
335 to the cytoplasm, though it was dispensable for translocation in response to feeding, suggesting  
336 overlapping function with other insulin-like peptides. We identify polypeptides as a bacterial  
337 component that functions as a food cue for starved larvae. Perception of polypeptide caused  
338 GFP::DAF-16 to translocate and caused an irreversible arrest phenotype. Together our results  
339 suggest that chemosensation of environmental polypeptides promotes transcription and likely

340 secretion of DAF-28 from ASI and ASJ amphid neurons to mediate systemic effects on gene  
341 expression and metabolism. In support of a direct effect of food perception on insulin-like  
342 peptide secretion from chemosensory neurons, inhibiting translation with cycloheximide did not  
343 block the effect of perception on GFP::DAF-16 localization. However, activation of IIS did not  
344 account for the entire gene expression response to food perception, nor did it account for the  
345 irreversible arrest phenotype. We conclude that food perception affects additional signaling  
346 pathways, and that these pathways collaborate with IIS to regulate gene expression and  
347 metabolism.

348 We conclude that *C. elegans* larvae sense environmental food-associated cues such as  
349 polypeptides, and that this perception affects signaling, gene regulation and metabolism. Worms  
350 likely use chemosensation to find food, and food perception may also serve to prime starved  
351 larvae for feeding and development. Such priming is apparently detrimental if not accompanied  
352 by feeding within hours, but we believe such a scenario where food cues are present without  
353 food is unnatural. In contrast, dauer larvae represent a common situation where starved larvae  
354 rely on perception to regulate development and metabolism. We show that dauer larvae exit  
355 arrest and resume development in response to perception of environmental polypeptides,  
356 similar to their response to NAD<sup>+</sup> (Mylenko, Boland et al. 2016). Starved non-dauer larvae are  
357 able to feed immediately upon encountering food, but perception of environmental cues could  
358 accelerate the organismal response by not requiring ingestion and assimilation of nutrients. With  
359 a fluctuating food supply and boom and bust population dynamics, we believe metabolic priming  
360 via food perception contributes to fitness by accelerating recovery from developmental arrest.

361

## 362 **Materials and Methods**

### 363 *C. elegans* growth conditions and strains

364 Strains were maintained on agar plates containing standard nematode growth media (NGM)  
365 seeded with *E. coli* OP50 at 20°C. The wild-type strain N2 (Bristol) and the following mutants  
366 and transgenes were used: *daf-2(e1370)*, *daf-16(mu86)*, *ayls7[Phlh-8::GFP]*, *avr-14(vu47)*, *glc-*  
367 *3(ok321)*, *avr-15(vu227)*, *glc-1(pk54)*, *dukls9[Pmyo-2::avr-15+Pmyo-2::mCherry+Pajm-1::AJM-*  
368 *1::GFP]*, *dukls10[Pmyo-2::avr-15+Pmyo-2::mCherry+Phlh-8::GFP]*, *qyls288 [Pdaf-*  
369 *16::GFP::DAF-16 + unc-119(+)]*, *qyls289 [Pdaf-16::GFP::DAF-16 + unc-119(+)]*, *daf-*  
370 *28(tm2308)*, *ins-4*, *5*, *6(hpDf761)*. Standard genetic techniques were used to make  
371 combinations of alleles.

372  
373 *dukls9* injection mix contained the following: 1 ng/μL pCFJ90 (*Pmyo-2::mCherry*), 1 ng/μL  
374 pPD30\_69\_TK414\_4A (*Pmyo-2::avr-15*), and 50 ng/μL pJS191 (*Pajm-1::AJM-1::GFP*). *dukls10*  
375 injection mix contained the following: 1 ng/μL pCFJ90 (*Pmyo-2::mCherry*), 1 ng/μL  
376 pPD30\_69\_TK414\_4A (*Pmyo-2::avr-15*), and 50 ng/μL pJKL464 (*Phlh-8::GFP*).

377

#### 378 Hypochlorite treatment and L1 arrest assays

379 Mixed-stage cultures on 10 cm NGM plates were washed from the plates using virgin S-basal  
380 (S-basal lacking ethanol and cholesterol) and centrifuged. A hypochlorite solution (7:2:1 ddH<sub>2</sub>O,  
381 sodium hypochlorite (Sigma), 5 M KOH) was added to dissolve the animals. Worms were  
382 centrifuged after 1.5-2 minutes in the hypochlorite solution and fresh solution was added. Total  
383 time in the hypochlorite solution was 8-10 minutes. Embryos were washed three times in virgin  
384 S-basal buffer (no ethanol or cholesterol) before final suspension in 3 to 6 mL virgin S-basal at a  
385 density of 1 worm/μL. Ivermectin (Sigma) dissolved in DMSO was added to the appropriate  
386 cultures. Ivermectin dose was adjusted such that worms did not eat. The dosage was 10 ng/mL  
387 unless otherwise stated. *avr-14(vu47)*; *glc-3(ok321) avr-15(vu227) glc-1(pk54)*; *dukls10[Pmyo-*  
388 *2::avr-15+Pmyo-2::mCherry+Phlh-8::GFP]* was treated with 20 ng/mL ivermectin, or 22.85 nM.



389 *avr-14(vu47); glc-3(ok321) avr-15(vu227) glc-1(pk54); dukIs9[Pmyo-2::avr-15+Pmyo-*  
390 *2::mCherry+Pajm-1::AJM-1::GFP]* was treated with 50 ng/mL ivermectin. Different doses of  
391 ivermectin were used to adjust for different levels of ivermectin resistance in different strains.  
392 DMSO was added in equal amounts to control tubes. DMSO concentration ranged from 0.05%  
393 to 0.2%. Embryos were cultured in a 16 mm glass tube on a tissue culture roller drum at  
394 approximately 25 rpm and 21-22°C.

395

396 For the M-cell division assay, 1 day following the hypochlorite treatment above the worms were  
397 put in the appropriate condition (LB, tryptone, etc.) and cultured for 7 days before 100 larvae per  
398 replicate were examined on a slide on a compound fluorescent microscope. For the seam cell  
399 division assay, 1 day following the hypochlorite treatment above HB101 was added at 25 mg/mL  
400 for 2 days and the V1-6 cells on one side of the animal were scored for 60 larvae per replicate.

401

#### 402 Starvation recovery

403 Animals were treated in hypochlorite solution and suspended in virgin S-basal with DMSO or  
404 ivermectin as described above. One day after hypochlorite treatment, the appropriate bacteria  
405 (HB101 unless otherwise stated) or partial food was added at the appropriate dose (25 mg/mL  
406 for bacteria unless otherwise stated). HB101 filtrate was created by filtering HB101 at 25 mg/mL  
407 through a 22 µm filter. Yeast extract was at 5 mg/mL. Tryptone and casamino acids were at 10  
408 mg/mL. Due to solubility limitations, casein and BSA were at 1 mg/mL. Ethanol was at 0.095%  
409 (v/v). Glucose was at 5% (w/v), or 278 mM. Amino acid solution (16 mg/mL) made up as in  
410 (Fukuyama, Kontani et al. 2015). Food addition was considered the 0 hr timepoint (Fig. 1A). 100  
411 µL aliquots were sampled at the stated times up to 24 hr and placed around the edge of a  
412 HB101 lawn on NGM plates. Number of plated worms ( $T_p$ ) was counted and the plates were

413 incubated at 20°C. After three days the number of animals that recovered to at least the L4  
414 stage ( $T_R$ ) was counted. Recovery was calculated as  $T_R/T_p$ .

415

#### 416 GFP bead ingestion

417 Cultures were setup as for a starvation recovery experiment as above, except instead of plating  
418 the worms after 24 hr GFP beads (Fluoresbrite® YG Carboxylate Microspheres 0.10µm from  
419 Polysciences) were added at 1:200 to the cultures. After 3-4 hr the cultures were examined on a  
420 slide on a compound fluorescent microscope. The location of the GFP beads was scored for 40  
421 worms per replicate.

422

#### 423 α-amanitin and cycloheximide treatment

424 Dose response curves with α-amanitin (Sigma) and cycloheximide (Sigma) were done using the  
425 gpls1 [*Phsp-16.2::GFP*] reporter (Link, Cypser et al. 1999) to find a dose that prevented  
426 fluorescence in response to heat shock at 33°C for two hr. These doses were determined to be  
427 5 mM for cycloheximide and 25 µg/mL for α-amanitin. Both drug stocks were dissolved in water.  
428 The starvation recovery assay was set up as above, with drugs added two hr before food  
429 addition and cultures washed three times with 10 mL virgin S-basal before plating.

430

#### 431 mRNA-Seq and associated analysis

432 Worm cultures for *avr-14(vu47); glc-3(ok321) avr-15(vu227) glc-1(pk54); dukIs10[Pmyo-2::avr-*  
433 *15+Pmyo-2::mCherry+Phlh-8::GFP]* were set up using the hypochlorite treatment as described  
434 above, except in S-complete and scaled up to 20 mL per condition. Either ivermectin was added  
435 at 5 ng/mL or DMSO was added at 0.1%. After 24 hr to allow for hatching and synchronization,

436 HB101 was added at 25 mg/mL to the food tubes. Samples were collected at 1 hr and 24 hr  
437 after food addition. To collect the samples, worms were washed 3 times with 10 mL virgin S-  
438 basal then concentrated in 100  $\mu$ L and frozen in liquid nitrogen. RNA was extracted with Trizol  
439 and chloroform. Libraries were prepared for sequencing using the NEBNext Ultra RNA Library  
440 Prep Kit for Illumina (E7530) with 250-400ng of starting RNA per library and 13 cycles of PCR.  
441 Libraries were sequenced using Illumina HiSeq 4000. Bowtie was used to map reads to the  
442 WS210 genome (Langmead, Trapnell et al. 2009). Transcripts annotated in WS220 that were  
443 mapped to the WS210 genome coordinates were also included, as described previously  
444 (Maxwell, Antoshechkin et al. 2012). Mapping efficiencies ranged from 78-85% for all libraries.  
445 HTSeq was used to generate count tables for each library (Anders, Pyl et al. 2015). Count  
446 tables were analyzed for differential expression using the edgeR package in R (Robinson,  
447 McCarthy et al. 2010). Detected genes were considered those expressed at a level of at least 1  
448 count-per-million (CPM) in at least four libraries, reducing the number of genes included in the  
449 analysis to 18190. The “calcNormFactors” function was used to normalize for RNA composition  
450 and the tagwise dispersion estimate was used for differential expression analysis. The exact  
451 test was used for pairwise comparisons of conditions. Differentially expressed genes were  
452 considered those with an FDR < 0.05 and with  $|\log_2(\text{fold change})| > 0.5$ . Principal component  
453 analysis was performed using all libraries and all genes used in differential expression analysis  
454 (18190 genes). Counts-per-million (CPM) values for each gene were mean-normalized across  
455 all libraries and  $\log_2$  transformed prior to using the prcomp function in R. GEO accession  
456 number for the dataset is GSE114955. GO term analysis was performed using GOzilla (Eden,  
457 Lipson et al. 2007, Eden, Navon et al. 2009). AmiGO 2 was accessed to download the genes in  
458 the metabolic process GO term (GO:0044710) and the larval development GO term  
459 (GO:0002164) (Ashburner, Ball et al. 2000, Carbon, Ireland et al. 2009, The Gene Ontology  
460 2017).

461

462 GFP::DAF-16 localization

463 The *qyls288 [Pdaf-16::GFP::DAF-16 + unc-119(+)]* and *qyls289 [Pdaf-16::GFP::DAF-16 + unc-*  
464 *119(+)]* reporters (Kaplan, Chen et al. 2015) were analyzed in a *daf-16(mu86); unc-119(ed4)*  
465 mutant background. Standard genetic methods were used to cross *daf-28(tm2308)* and *ins-4, 5,*  
466 *6(hpDf761)* into this background as well. Cultures were set up using the hypochlorite treatment  
467 as described above. One day later HB101 was added at 25 mg/mL. One hr or 24 hr after food  
468 addition 50 larvae per replicate were examined on a slide on a compound fluorescent  
469 microscope.

470

471 Reporter gene analysis

472 The *mgIs40 [Pdaf-28::GFP]* reporter (Li, Kennedy et al. 2003) was analyzed in a wild type  
473 genetic background. Strain was maintained on NGM agar plates with *E. coli* OP50 as food at  
474 20°C. Eggs were prepared by standard hypochlorite treatment. These eggs were used to set up  
475 a liquid culture consisting of virgin S-basal with a defined density of 1 worm/ $\mu$ l. Ivermectin was  
476 added at 10 ng/mL to the appropriate cultures. After 18 hr to allow for hatching, the *E. coli*  
477 HB101 was added at 25 mg/ml to the fed samples. 6 hr post food addition, the samples were  
478 washed three times with 10 mL S-basal and then run through the COPAS BioSorter measuring  
479 GFP fluorescence. Analysis of the COPAS data was performed in R. Data points were removed  
480 if they were determined to be debris by size. Fluorescence signal was normalized by optical  
481 extinction. For imaging, the samples were prepared in the same way then paralyzed with 3.75  
482 mM sodium azide and placed on a Noble agar slide. Images were taken on a compound  
483 fluorescent microscope.

484

485 Fixation and Nile red staining

486 Cultures of N2 wild type were setup as for a starvation recovery experiment as above, except  
487 instead of plating the worms after 24 hr the cultures were washed three times with 10 mL virgin  
488 S-basal. Worms were concentrated in approximately 100  $\mu$ L and frozen at  $-80^{\circ}\text{C}$ . Fixation and  
489 staining protocol was modified from (Pino, Webster et al. 2013), using 1.7 mL Eppendorf tubes  
490 instead of 96-well plates and 200  $\mu$ L solution additions instead of 150  $\mu$ L. Images were taken on  
491 a compound fluorescent microscope. Fat droplets were quantified using the Analyze Particles  
492 function in Image J. Images were thresholded using negative controls to remove background.  
493 Minimum particle size was set as 0.002  $\text{in}^2$ .

494

495 Starvation survival

496 N2 wild type animals were treated in hypochlorite solution and suspended in virgin S-basal or  
497 the appropriate media as described above. 100  $\mu$ L aliquots were sampled on different days and  
498 placed around the edge of an OP50 lawn on NGM plates. Number of plated worms ( $T_p$ ) was  
499 counted and the plates were incubated at  $20^{\circ}\text{C}$ . After two days the number of animals that  
500 survived ( $T_s$ ) was counted. Survival was calculated as  $T_s/T_p$ . Survival curves were obtained by  
501 fitting survival data for each trial with the function

502

$$S = 100 - \frac{100}{1 + e^{(t_{half}-t)/rate}}$$

503

504

505 Quantitative image analysis of size

506 N2 wild type animals were treated in hypochlorite solution and suspended in virgin S-basal or  
507 the appropriate media as described above. At the 50% survival times determined from  
508 starvation survival experiments the worms were spun down at 3000 rpm for 1 minute and pellets  
509 were transferred to OP50 seeded NGM plates. Worms were allowed to recover for 48 hr at  
510 20°C. Worms were then imaged and images were processed using the WormSizer plug-in for  
511 Fiji/ImageJ as described (Moore, Jordan et al. 2013).

512

### 513 Dauer recovery

514 N2 worms were treated in hypochlorite solution as described above then resuspended in S-  
515 complete at a concentration of 5 worms/ $\mu$ L and 1 mg/mL HB101 in 25 mL Erlenmeyer flasks  
516 (Baugh, Kurhanewicz et al. 2011). Flasks were placed on a shaker at 20°C for one week to form  
517 dauers. Cultures were spun down at 3000 rpm for 1 minute. Supernatant was aspirated and the  
518 appropriate media (LB, tryptone, etc.) was added, retaining concentration of 5 worms/ $\mu$ L.  
519 Cultures were returned to shaker for three days. Approximately 75-100 worms were placed on a  
520 depression slide and scored as dauer, L4, or adult.

521

### 522 Data analysis and statistics

523 Data were handled in R and Excel. Graphs were plotted in the R packages ggplot2 or  
524 Venerable or Excel. Statistical tests were performed in R or Excel. Starvation survival analysis  
525 was performed on 50% survival times ( $t_{half}$ ), which were obtained as in (Kaplan, Chen et al.  
526 2015), with unpaired t-tests performed where n = number of replicates.

527

### 528 **Acknowledgements**

529 We would like to thank Joel Meyer and David R. Sherwood for sharing lab equipment and  
530 Baugh lab members for helpful discussions. We thank the Duke University School of Medicine  
531 and the Center for Genomic and Computational Biology for use of the Sequencing and Genomic  
532 Technologies core resource, which provided RNA sequencing service. Some strains were  
533 provided by the CGC, which is funded by NIH Office of Research Infrastructure Programs (P40  
534 OD010440). Funding was provided by the National Institutes of Health (R01GM117408, LRB).

535

### 536 **Author Contributions**

537 Contributed reagents: REWK, JAD. Conceived and designed experiments: REWK, JAD, LRB.  
538 Performed experiments: REWK, RC. Analyzed data: REWK, AKW. Wrote the paper: REWK,  
539 LRB.

540

## 541 **References**

- 542
- 543 Alcedo, J. and C. Kenyon (2004). "Regulation of *C. elegans* longevity by specific gustatory and olfactory
- 544 neurons." *Neuron* **41**(1): 45-55.
- 545 Anders, S., P. T. Pyl and W. Huber (2015). "HTSeq--a Python framework to work with high-throughput
- 546 sequencing data." *Bioinformatics* **31**(2): 166-169.
- 547 Apfeld, J. and C. Kenyon (1999). "Regulation of lifespan by sensory perception in *Caenorhabditis*
- 548 *elegans*." *Nature* **402**(6763): 804-809.
- 549 Ashburner, M., C. A. Ball, J. A. Blake, D. Botstein, H. Butler, J. M. Cherry, A. P. Davis, K. Dolinski, S. S.
- 550 Dwight, J. T. Eppig, M. A. Harris, D. P. Hill, L. Issel-Tarver, A. Kasarskis, S. Lewis, J. C. Matese, J. E.
- 551 Richardson, M. Ringwald, G. M. Rubin and G. Sherlock (2000). "Gene ontology: tool for the unification of
- 552 biology. The Gene Ontology Consortium." *Nat Genet* **25**(1): 25-29.
- 553 Avery, L. and H. R. Horvitz (1990). "Effects of starvation and neuroactive drugs on feeding in
- 554 *Caenorhabditis elegans*." *J Exp Zool* **253**(3): 263-270.
- 555 Avery, L. and Y. J. You (2012). "*C. elegans* feeding." *WormBook*: 1-23.
- 556 Bargmann, C. I. (2006). "Chemosensation in *C. elegans*." *WormBook*: 1-29.
- 557 Baugh, L. R. (2013). "To Grow or Not to Grow: Nutritional Control of Development During
- 558 *Caenorhabditis elegans* L1 Arrest." *Genetics* **194**(3): 539-555.
- 559 Baugh, L. R., J. Demodena and P. W. Sternberg (2009). "RNA Pol II accumulates at promoters of growth
- 560 genes during developmental arrest." *Science* **324**(5923): 92-94.
- 561 Baugh, L. R., N. Kurhanewicz and P. W. Sternberg (2011). "Sensitive and precise quantification of insulin-
- 562 like mRNA expression in *Caenorhabditis elegans*." *PLoS One* **6**(3): e18086.
- 563 Baugh, L. R. and P. W. Sternberg (2006). "DAF-16/FOXO regulates transcription of *cki-1/Cip/Kip* and
- 564 repression of *lin-4* during *C. elegans* L1 arrest." *Curr Biol* **16**(8): 780-785.
- 565 Carbon, S., A. Ireland, C. J. Mungall, S. Shu, B. Marshall, S. Lewis, G. O. H. Ami and G. Web Presence
- 566 Working (2009). "AmiGO: online access to ontology and annotation data." *Bioinformatics* **25**(2): 288-
- 567 289.
- 568 Cassada, R. C. and R. L. Russell (1975). "The dauerlarva, a post-embryonic developmental variant of the
- 569 nematode *Caenorhabditis elegans*." *Dev Biol* **46**(2): 326-342.
- 570 Chen, Y. and L. R. Baugh (2014). "Ins-4 and *daf-28* function redundantly to regulate *C. elegans* L1 arrest."
- 571 *Dev Biol* **394**(2): 314-326.
- 572 Cornils, A., M. Gloeck, Z. Chen, Y. Zhang and J. Alcedo (2011). "Specific insulin-like peptides encode
- 573 sensory information to regulate distinct developmental processes." *Development* **138**(6): 1183-1193.
- 574 Cully, D. F., D. K. Vassilatis, K. K. Liu, P. S. Paress, L. H. Van der Ploeg, J. M. Schaeffer and J. P. Arena
- 575 (1994). "Cloning of an avermectin-sensitive glutamate-gated chloride channel from *Caenorhabditis*
- 576 *elegans*." *Nature* **371**(6499): 707-711.
- 577 Dent, J. A., M. W. Davis and L. Avery (1997). "*avr-15* encodes a chloride channel subunit that mediates
- 578 inhibitory glutamatergic neurotransmission and ivermectin sensitivity in *Caenorhabditis elegans*." *EMBO*
- 579 *J* **16**(19): 5867-5879.
- 580 Dent, J. A., M. M. Smith, D. K. Vassilatis and L. Avery (2000). "The genetics of ivermectin resistance in
- 581 *Caenorhabditis elegans*." *Proc Natl Acad Sci U S A* **97**(6): 2674-2679.
- 582 Eden, E., D. Lipson, S. Yogev and Z. Yakhini (2007). "Discovering motifs in ranked lists of DNA sequences."
- 583 *PLoS Comput Biol* **3**(3): e39.
- 584 Eden, E., R. Navon, I. Steinfeld, D. Lipson and Z. Yakhini (2009). "GORilla: a tool for discovery and
- 585 visualization of enriched GO terms in ranked gene lists." *BMC Bioinformatics* **10**: 48.
- 586 Fukuyama, M., K. Kontani, T. Katada and A. E. Rougvie (2015). "The *C. elegans* Hypodermis Couples
- 587 Progenitor Cell Quiescence to the Dietary State." *Curr Biol*.



588 Fukuyama, M., A. E. Rougvie and J. H. Rothman (2006). "C. elegans DAF-18/PTEN mediates nutrient-  
589 dependent arrest of cell cycle and growth in the germline." *Curr Biol* **16**(8): 773-779.

590 Goodman, M. B. (2006). "Mechanosensation." *WormBook*: 1-14.

591 Gupta, B. P., M. Wang and P. W. Sternberg (2003). "The C. elegans LIM homeobox gene lin-11 specifies  
592 multiple cell fates during vulval development." *Development* **130**(12): 2589-2601.

593 Henderson, S. T. and T. E. Johnson (2001). "daf-16 integrates developmental and environmental inputs  
594 to mediate aging in the nematode *Caenorhabditis elegans*." *Curr Biol* **11**(24): 1975-1980.

595 Hibshman, J. D., A. E. Doan, B. T. Moore, R. E. Kaplan, A. Hung, A. K. Webster, D. P. Bhatt, R. Chitrakar,  
596 M. D. Hirschey and L. R. Baugh (2017). "daf-16/FoxO promotes gluconeogenesis and trehalose synthesis  
597 during starvation to support survival." *Elife* **6**.

598 Horoszok, L., V. Raymond, D. B. Sattelle and A. J. Wolstenholme (2001). "GLC-3: a novel fipronil and  
599 BIDN-sensitive, but picrotoxinin-insensitive, L-glutamate-gated chloride channel subunit from  
600 *Caenorhabditis elegans*." *Br J Pharmacol* **132**(6): 1247-1254.

601 Hu, P. J. (2007). "Dauer." *WormBook*: 1-19.

602 Hung, W. L., Y. Wang, J. Chitturi and M. Zhen (2014). "A *Caenorhabditis elegans* developmental decision  
603 requires insulin signaling-mediated neuron-intestine communication." *Development* **141**(8): 1767-1779.

604 Kaplan, R. E., Y. Chen, B. T. Moore, J. M. Jordan, C. S. Maxwell, A. J. Schindler and L. R. Baugh (2015).  
605 "dbl-1/TGF-beta and daf-12/NHR Signaling Mediate Cell-Nonautonomous Effects of daf-16/FOXO on  
606 Starvation-Induced Developmental Arrest." *PLoS Genet* **11**(12): e1005731.

607 Kimura, K. D., D. L. Riddle and G. Ruvkun (2011). "The C. elegans DAF-2 insulin-like receptor is  
608 abundantly expressed in the nervous system and regulated by nutritional status." *Cold Spring Harb Symp*  
609 *Quant Biol* **76**: 113-120.

610 Langmead, B., C. Trapnell, M. Pop and S. L. Salzberg (2009). "Ultrafast and memory-efficient alignment  
611 of short DNA sequences to the human genome." *Genome Biol* **10**(3): R25.

612 Lans, H. and G. Jansen (2007). "Multiple sensory G proteins in the olfactory, gustatory and nociceptive  
613 neurons modulate longevity in *Caenorhabditis elegans*." *Dev Biol* **303**(2): 474-482.

614 Li, W., S. G. Kennedy and G. Ruvkun (2003). "daf-28 encodes a C. elegans insulin superfamily member  
615 that is regulated by environmental cues and acts in the DAF-2 signaling pathway." *Genes Dev* **17**(7): 844-  
616 858.

617 Libert, S., J. Zwiener, X. Chu, W. Vanvoorhies, G. Roman and S. D. Pletcher (2007). "Regulation of  
618 *Drosophila* life span by olfaction and food-derived odors." *Science* **315**(5815): 1133-1137.

619 Lin, K., J. B. Dorman, A. Rodan and C. Kenyon (1997). "daf-16: An HNF-3/forkhead family member that  
620 can function to double the life-span of *Caenorhabditis elegans*." *Science* **278**(5341): 1319-1322.

621 Link, C. D., J. R. Cypser, C. J. Johnson and T. E. Johnson (1999). "Direct observation of stress response in  
622 *Caenorhabditis elegans* using a reporter transgene." *Cell Stress Chaperones* **4**(4): 235-242.

623 Maxwell, C. S., I. Antoshechkin, N. Kurhanewicz, J. A. Belsky and L. R. Baugh (2012). "Nutritional control  
624 of mRNA isoform expression during developmental arrest and recovery in C. elegans." *Genome Res*  
625 **22**(10): 1920-1929.

626 McColl, G., A. N. Rogers, S. Alavez, A. E. Hubbard, S. Melov, C. D. Link, A. I. Bush, P. Kapahi and G. J.  
627 Lithgow (2010). "Insulin-like signaling determines survival during stress via posttranscriptional  
628 mechanisms in C. elegans." *Cell Metab* **12**(3): 260-272.

629 Moore, B. T., J. M. Jordan and L. R. Baugh (2013). "WormSizer: high-throughput analysis of nematode  
630 size and shape." *PLoS One* **8**(2): e57142.

631 Morris, J. Z., H. A. Tissenbaum and G. Ruvkun (1996). "A phosphatidylinositol-3-OH kinase family  
632 member regulating longevity and diapause in *Caenorhabditis elegans*." *Nature* **382**(6591): 536-539.

633 Mylenko, M., S. Boland, S. Penkov, J. L. Sampaio, B. Lombardot, D. Vorkel, J. M. Verbavatz and T. V.  
634 Kurzchalia (2016). "NAD+ Is a Food Component That Promotes Exit from Dauer Diapause in  
635 *Caenorhabditis elegans*." *PLoS One* **11**(12): e0167208.

636 Ogg, S., S. Paradis, S. Gottlieb, G. I. Patterson, L. Lee, H. A. Tissenbaum and G. Ruvkun (1997). "The Fork  
637 head transcription factor DAF-16 transduces insulin-like metabolic and longevity signals in *C. elegans*."  
638 Nature **389**(6654): 994-999.

639 Pierce, S. B., M. Costa, R. Wisotzkey, S. Devadhar, S. A. Homburger, A. R. Buchman, K. C. Ferguson, J.  
640 Heller, D. M. Platt, A. A. Pasquinelli, L. X. Liu, S. K. Doberstein and G. Ruvkun (2001). "Regulation of DAF-  
641 2 receptor signaling by human insulin and ins-1, a member of the unusually large and diverse *C. elegans*  
642 insulin gene family." Genes Dev **15**(6): 672-686.

643 Pino, E. C., C. M. Webster, C. E. Carr and A. A. Soukas (2013). "Biochemical and high throughput  
644 microscopic assessment of fat mass in *Caenorhabditis elegans*." J Vis Exp(73).

645 Riddle, D. L., M. M. Swanson and P. S. Albert (1981). "Interacting genes in nematode dauer larva  
646 formation." Nature **290**(5808): 668-671.

647 Riera, C. E., E. Tsaousidou, J. Halloran, P. Follett, O. Hahn, M. M. A. Pereira, L. E. Ruud, J. Alber, K. Tharp,  
648 C. M. Anderson, H. Bronneke, B. Hampel, C. D. M. Filho, A. Stahl, J. C. Bruning and A. Dillin (2017). "The  
649 Sense of Smell Impacts Metabolic Health and Obesity." Cell Metab **26**(1): 198-211 e195.

650 Robinson, M. D., D. J. McCarthy and G. K. Smyth (2010). "edgeR: a Bioconductor package for differential  
651 expression analysis of digital gene expression data." Bioinformatics **26**(1): 139-140.

652 Sanford, T., M. Golomb and D. L. Riddle (1983). "RNA polymerase II from wild type and alpha-amanitin-  
653 resistant strains of *Caenorhabditis elegans*." J Biol Chem **258**(21): 12804-12809.

654 Sawin, E. R., R. Ranganathan and H. R. Horvitz (2000). "*C. elegans* locomotory rate is modulated by the  
655 environment through a dopaminergic pathway and by experience through a serotonergic pathway."  
656 Neuron **26**(3): 619-631.

657 Sjoström, L., G. Garellick, M. Krotkiewski and A. Luyckx (1980). "Peripheral insulin in response to the  
658 sight and smell of food." Metabolism **29**(10): 901-909.

659 Stadler, M. and A. Fire (2013). "Conserved translome remodeling in nematode species executing a  
660 shared developmental transition." PLoS Genet **9**(10): e1003739.

661 Sulston, J. E. and H. R. Horvitz (1977). "Post-embryonic cell lineages of the nematode, *Caenorhabditis*  
662 *elegans*." Dev Biol **56**(1): 110-156.

663 The Gene Ontology, C. (2017). "Expansion of the Gene Ontology knowledgebase and resources." Nucleic  
664 Acids Res **45**(D1): D331-D338.

665 Vassilatis, D. K., J. P. Arena, R. H. Plasterk, H. A. Wilkinson, J. M. Schaeffer, D. F. Cully and L. H. Van der  
666 Ploeg (1997). "Genetic and biochemical evidence for a novel avermectin-sensitive chloride channel in  
667 *Caenorhabditis elegans*. Isolation and characterization." J Biol Chem **272**(52): 33167-33174.

668 Zaslaver, A., L. R. Baugh and P. W. Sternberg (2011). "Metazoan operons accelerate recovery from  
669 growth-arrested states." Cell **145**(6): 981-992.

670

671 **Figure Legends**

672

673 **Figure 1. Prolonged exposure to food perception triggers an inability to recover that is**  
674 **mediated by a transcriptional/translational response.** (A) Diagram of experimental set-up  
675 with four standard treatment conditions over time. Dimethyl sulfoxide (DMSO; solvent) (B)  
676 Representative images of worm recovery after three days post starvation. (C) L1 starvation  
677 recovery is plotted over time for three biological replicates. (D) The proportion of larvae that  
678 recovered to at least the L4 stage after three days of recovery is plotted for three to five  
679 biological replicates. (E) The proportion of larvae that recovered to at least the L4 stage after  
680 three days of recovery is plotted for three to five biological replicates. (C-E) \*\*\* $p < 0.001$ ,  
681 \*\* $p < 0.01$ ; unpaired t-test. Error bars are SEM.

682

683 **Figure 2. mRNA-seq reveals transcriptional effects of food perception.** (A) PCA of four  
684 biological replicates is plotted. Ellipses represent 80% confidence intervals, the probability for  
685 two of which not overlapping by chance is approximately 0.04. (B) Mean gene expression  
686 changes of four biological replicates is plotted. (C) Overlap between genes significantly affected  
687 by food with genes significantly affected by ivermectin and food is plotted. (D) Mean gene  
688 expression changes of four biological replicates is plotted. (E) Overlap between genes  
689 significantly affected by ivermectin and food at 1 hr with genes significantly affected by  
690 ivermectin and food at 24 hr is plotted. (F) Mean gene expression changes of two to four  
691 biological replicates is plotted. The universal set of genes considered includes only those  
692 analyzed in both studies. (G) Overlap between genes significantly affected by ivermectin and  
693 food with genes significantly affected by daf-16 is plotted.

694

695 **Figure 3. GFP::DAF-16 localization response to food perception is insulin-dependent.** (A)  
696 Representative images of how GFP::DAF-16 localization was characterized. (B) GFP::DAF-16

697 localization is plotted for three biological replicates. (C) Average transcript abundance from four  
698 biological replicates of mRNA-Seq is plotted for selected insulin-like peptides. Nominal p-values  
699 displayed. (D) Averages of *Pdaf-28::GFP* fluorescence intensity normalized by optical extinction  
700 per worm using the COPAS BioSorter are plotted for four biological replicates. Exposure to  
701 HB101 was 6 hr. (E) Representative images of *Pdaf-28::GFP* transcriptional reporter gene are  
702 presented. (F) GFP::*DAF-16* localization is plotted for three to six biological replicates. (G)  
703 GFP::*DAF-16* localization is plotted for three to six biological replicates. The 2-way ANOVA  
704 interaction p-value is listed. (H) GFP::*DAF-16* localization is plotted for three biological  
705 replicates. (I) The proportion of larvae that recovered to at least the L4 stage after three days of  
706 recovery is plotted for three to four biological replicates. (B-I) \*\*\*p<0.001, \*\*p<0.01; unpaired t-  
707 test. Error bars are SEM, except for in D where they are standard deviation.

708

709 **Figure 4. Food perception significantly affects metabolism but not development.** (A)  
710 Overlap between genes significantly affected by food with genes in the metabolic process and  
711 larval developmental process GO terms is plotted. (B) Overlap between genes significantly  
712 affected by ivermectin and food with genes in the metabolic process and larval developmental  
713 process GO terms is plotted. (C) The average number of seam cell divisions, out of six possible,  
714 is plotted for three biological replicates. Scoring was done two days after HB101 addition. (D)  
715 Representative DIC and GFP channel images of fixed worms following Nile red staining are  
716 presented. (E) Quantification of fat droplets in Nile red staining is plotted for three to four  
717 biological replicates. (C-E) \*\*\*p<0.001, \*\*p<0.01; unpaired t-test. Error bars are SEM.

718

719 **Figure 5. Perception of food cues affects L1 and dauer recovery.** (A-B) The proportion of  
720 larvae that recovered to at least the L4 stage after three days of recovery is plotted for three to  
721 thirteen biological replicates. (C) Recovery from dauer after three days in each condition is

722 plotted for three to four biological replicates. (A-C) \*\*\* $p < 0.001$ , \*\* $p < 0.01$ , \* $p < 0.05$ ; unpaired t-  
723 test. Error bars are SEM.

724

725 **Figure 6. An organismal response to perception of food.** Environmental polypeptides sensed  
726 by chemosensation activate IIS and drive altered gene expression, which affects lipid  
727 metabolism.

728

729 Supp. Figure 1. **Further characterization of ivermectin system and starvation recovery.** (A)

730 The proportion of larvae that displayed the stated localization of GFP beads three to four hours

731 after bead addition is plotted for three biological replicates. (B-C) The proportion of larvae that

732 recovered to at least the L4 stage after three days of recovery is plotted for three to four

733 biological replicates. Ivermectin Resistant = *avr-14(vu47); glc-3(ok321) avr-15(vu227) glc-*

734 *1(pk54)*. Ivermectin Sensitive = *avr-14(vu47); glc-3(ok321) avr-15(vu227) glc-1(pk54);*

735 *dukIs10[Pmyo-2::avr-15+Pmyo-2::mCherry+Phlh-8::GFP]*. \*\*\* $p < 0.001$ , \* $p < 0.05$ ; unpaired t-test.

736 (A-C) Error bars are SEM.

737

738 Supp. Figure 2. **Ivermectin affects transcription in larvae.** PCA of four biological replicates is

739 plotted. Ellipses represent 80% confidence interval.

740

741 Supp. Figure 3. **GFP::DAF-16 localization responds to perception of many bacterial foods**

742 **and requires *daf-2*.** (A-B) GFP::DAF-16 localization is plotted for three to four biological

743 replicates. Wild type is in N2 background. \*\*\* $p < 0.001$ ; unpaired t-test. Error bars are SEM.

744

745 Supp. Figure 4. **Food perception affects metabolism-related GO terms.** (A-C) Top ten GO

746 terms for stated gene groups are plotted from four biological replicates of RNA-seq.

747

748 Supp. Figure 5. **Perception and physiological effects of potential food cues.** (A) The  
749 proportion of larvae that recovered to at least the L4 stage after three days of recovery is plotted  
750 for three biological replicates. (B-C) GFP::*DAF-16* localization is plotted for three to six  
751 biological replicates. (D) L1 starvation survival is plotted over time. A logistic regression of mean  
752 survival from three biological replicates is shown. (E) Worm length following 48 hr of recovery is  
753 plotted relative to L1 starvation survival. (F) Worm length following 48 hr of recovery is plotted  
754 as a density plot, showing altered population composition. (A-E) \*\*\* $p < 0.001$ , \*\* $p < 0.01$ , \* $p < 0.05$ ;  
755 unpaired t-test. Error bars are SEM.

756

757 S1 Dataset. **mRNA-seq analysis of food perception.** Results of mRNA-seq analysis, including  
758 counts per gene, logFC, FDR, GOrilla analysis, and GO term gene lists used are included.

Figure 1

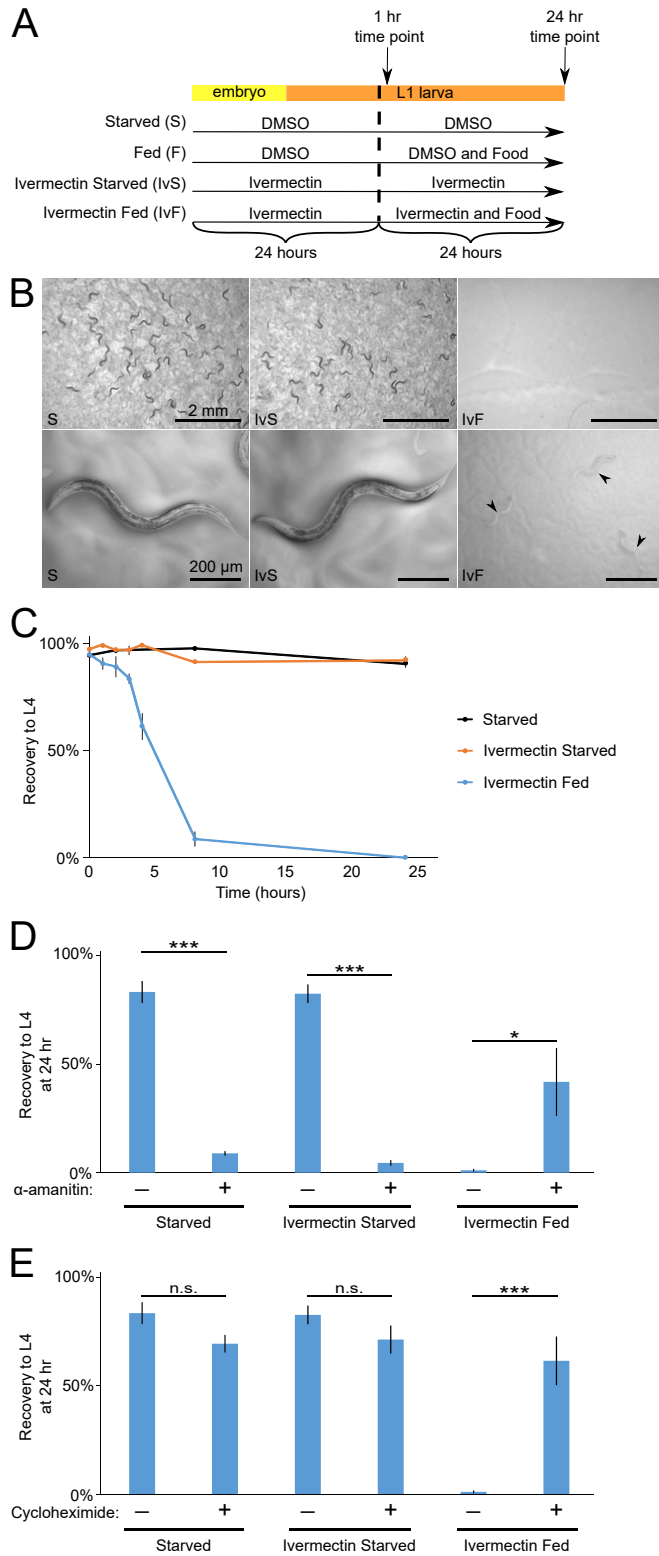

Figure 2

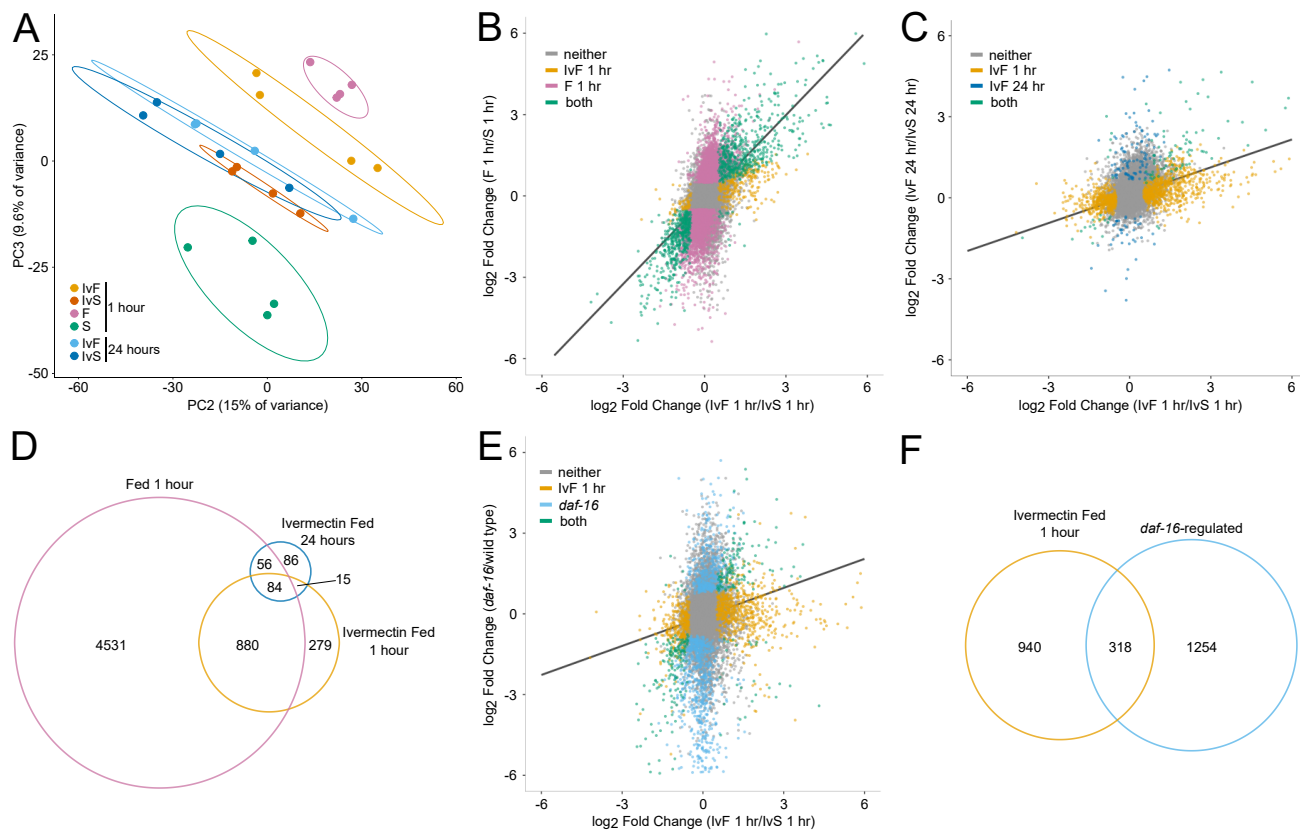



Figure 3

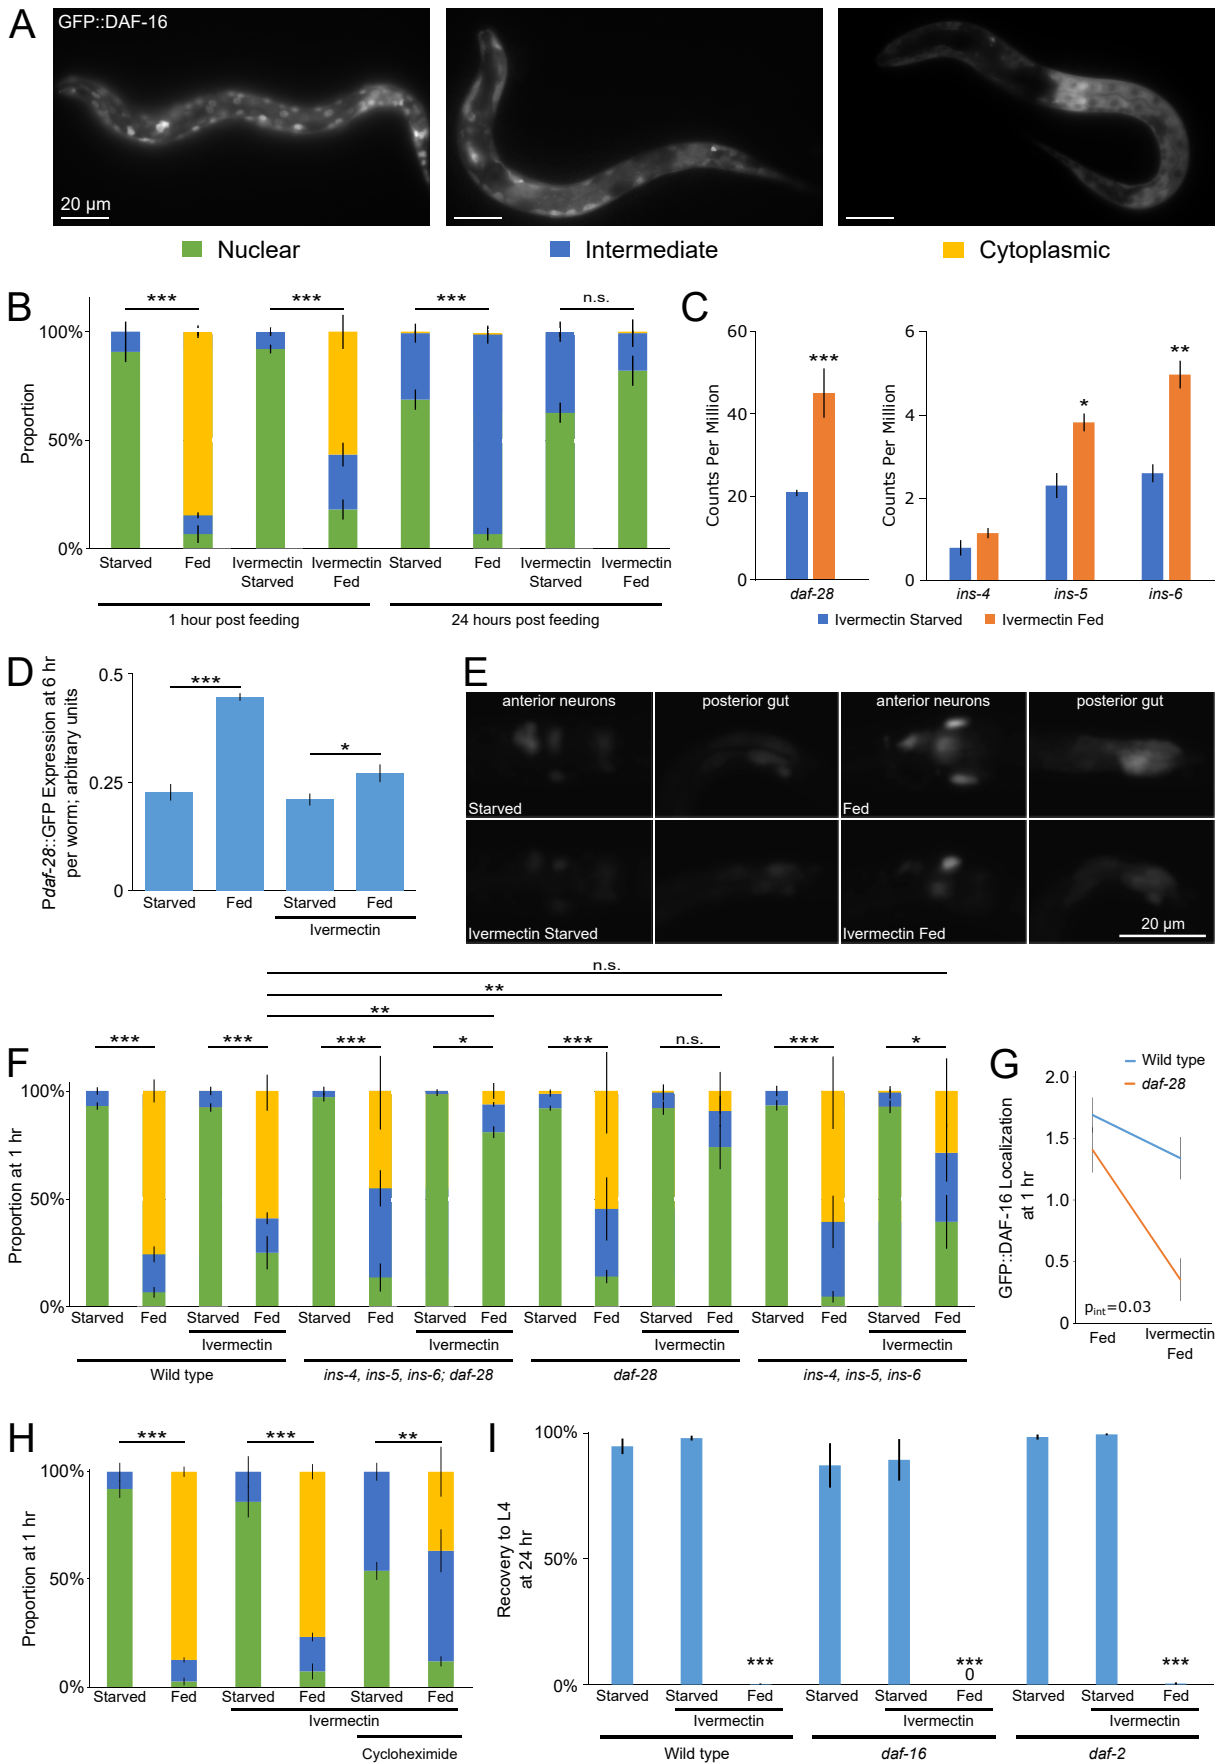

Figure 4

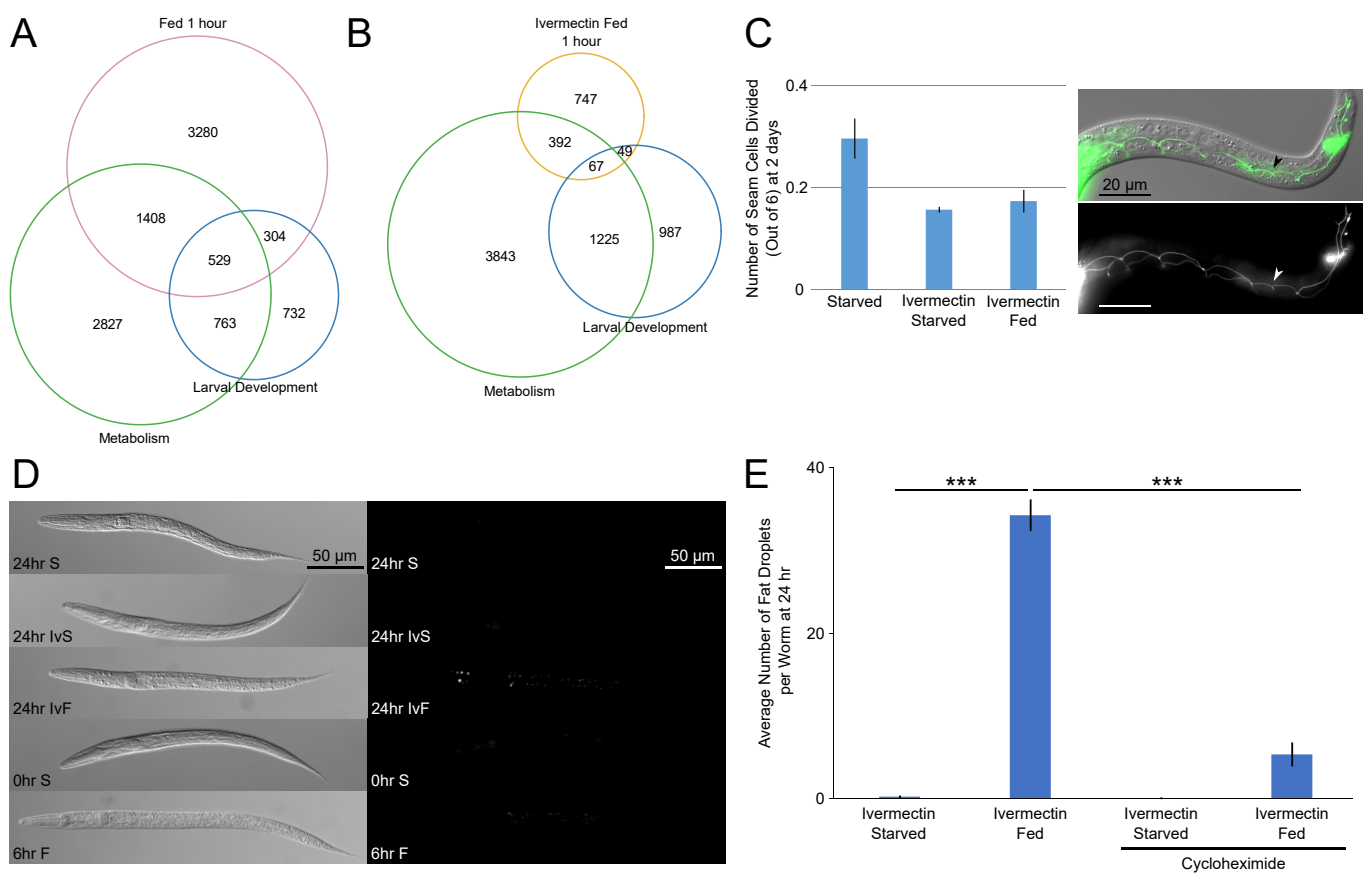

Figure 5

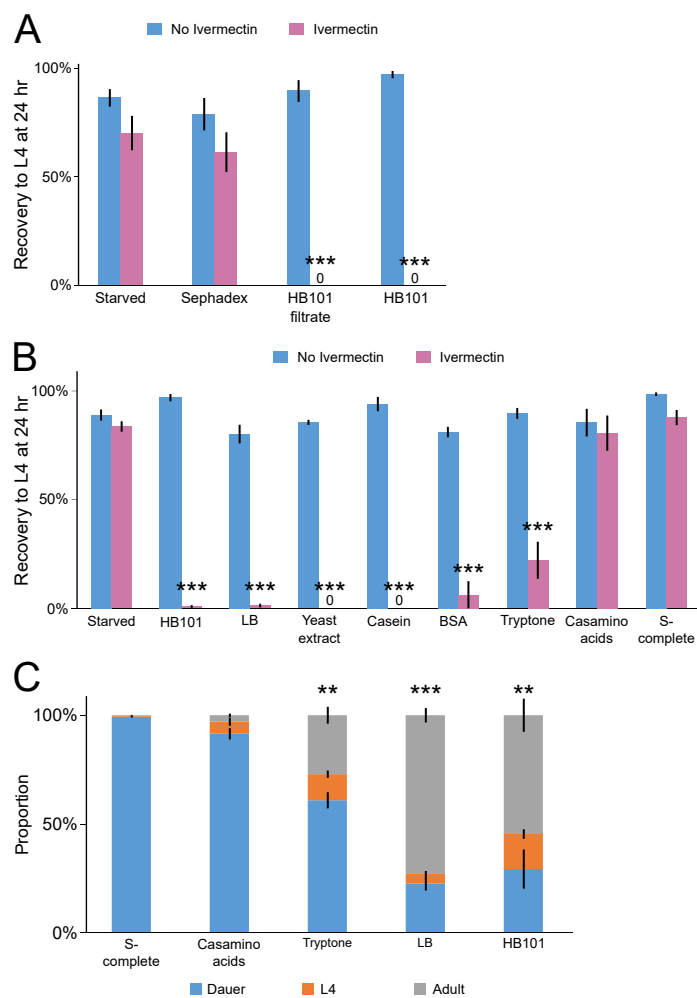

Figure 6

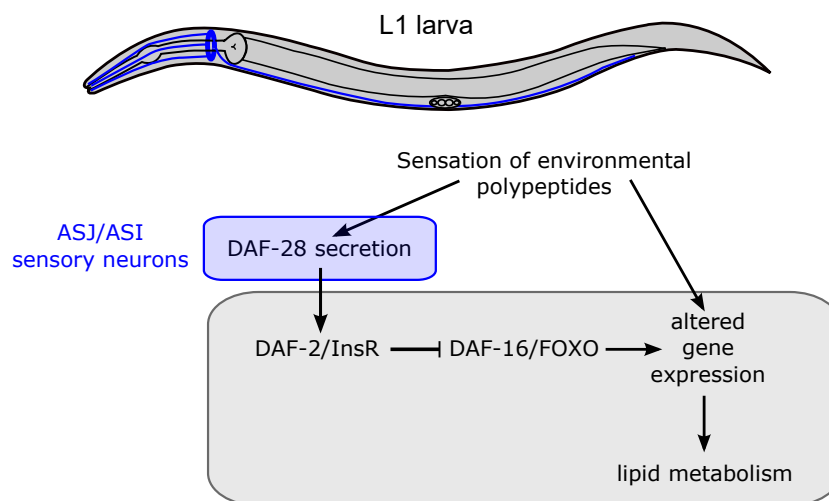

## Supp. Figure 1

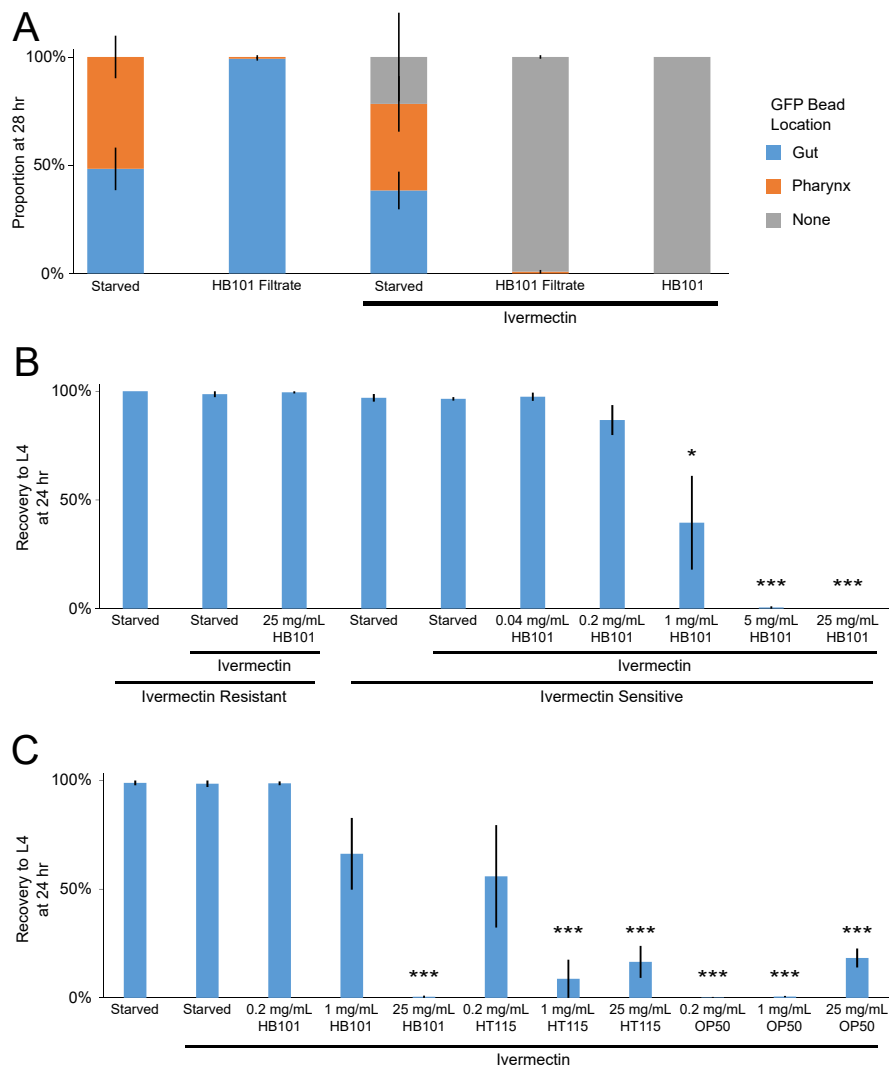

Supp. Figure 2

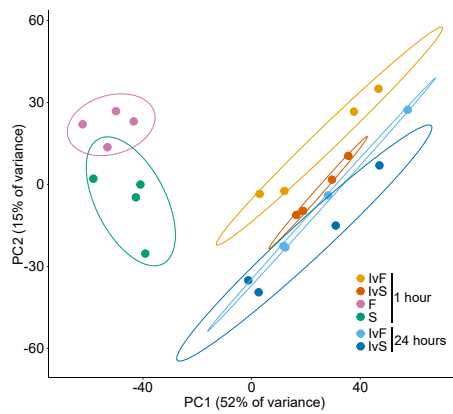

### Supp. Figure 3

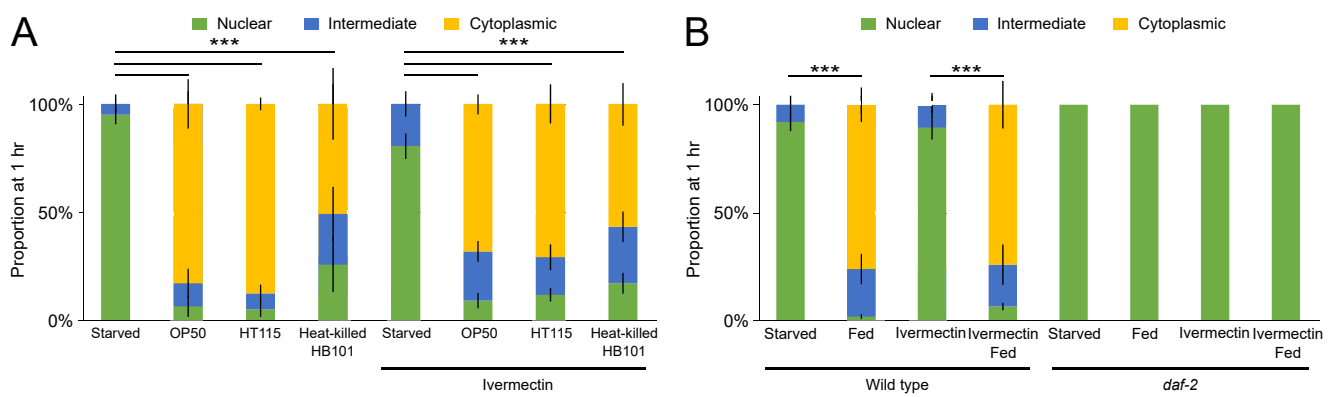

## Supp. Figure 4

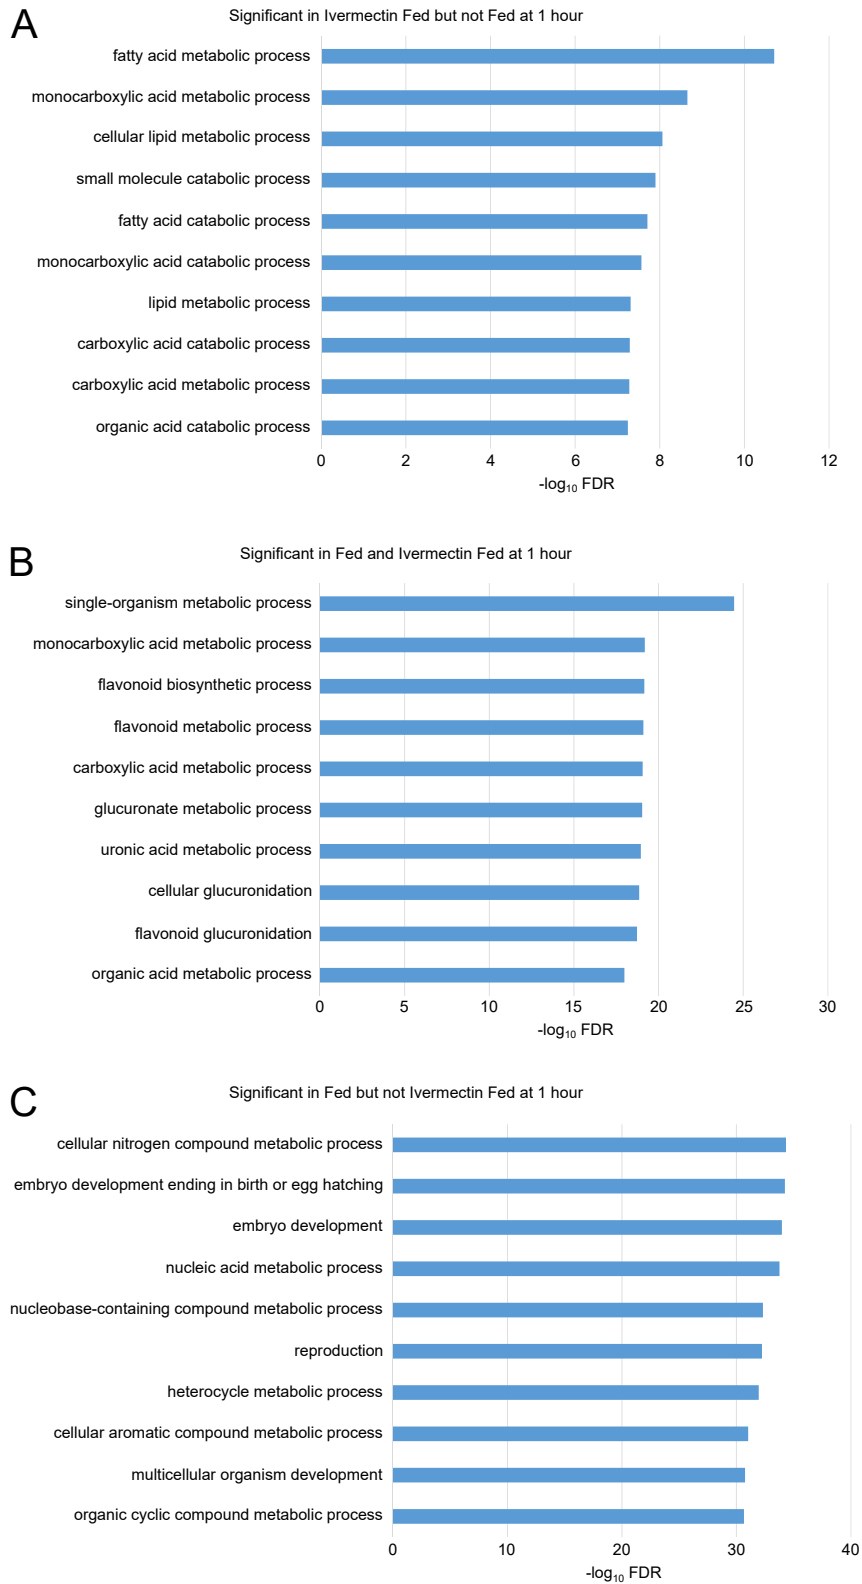



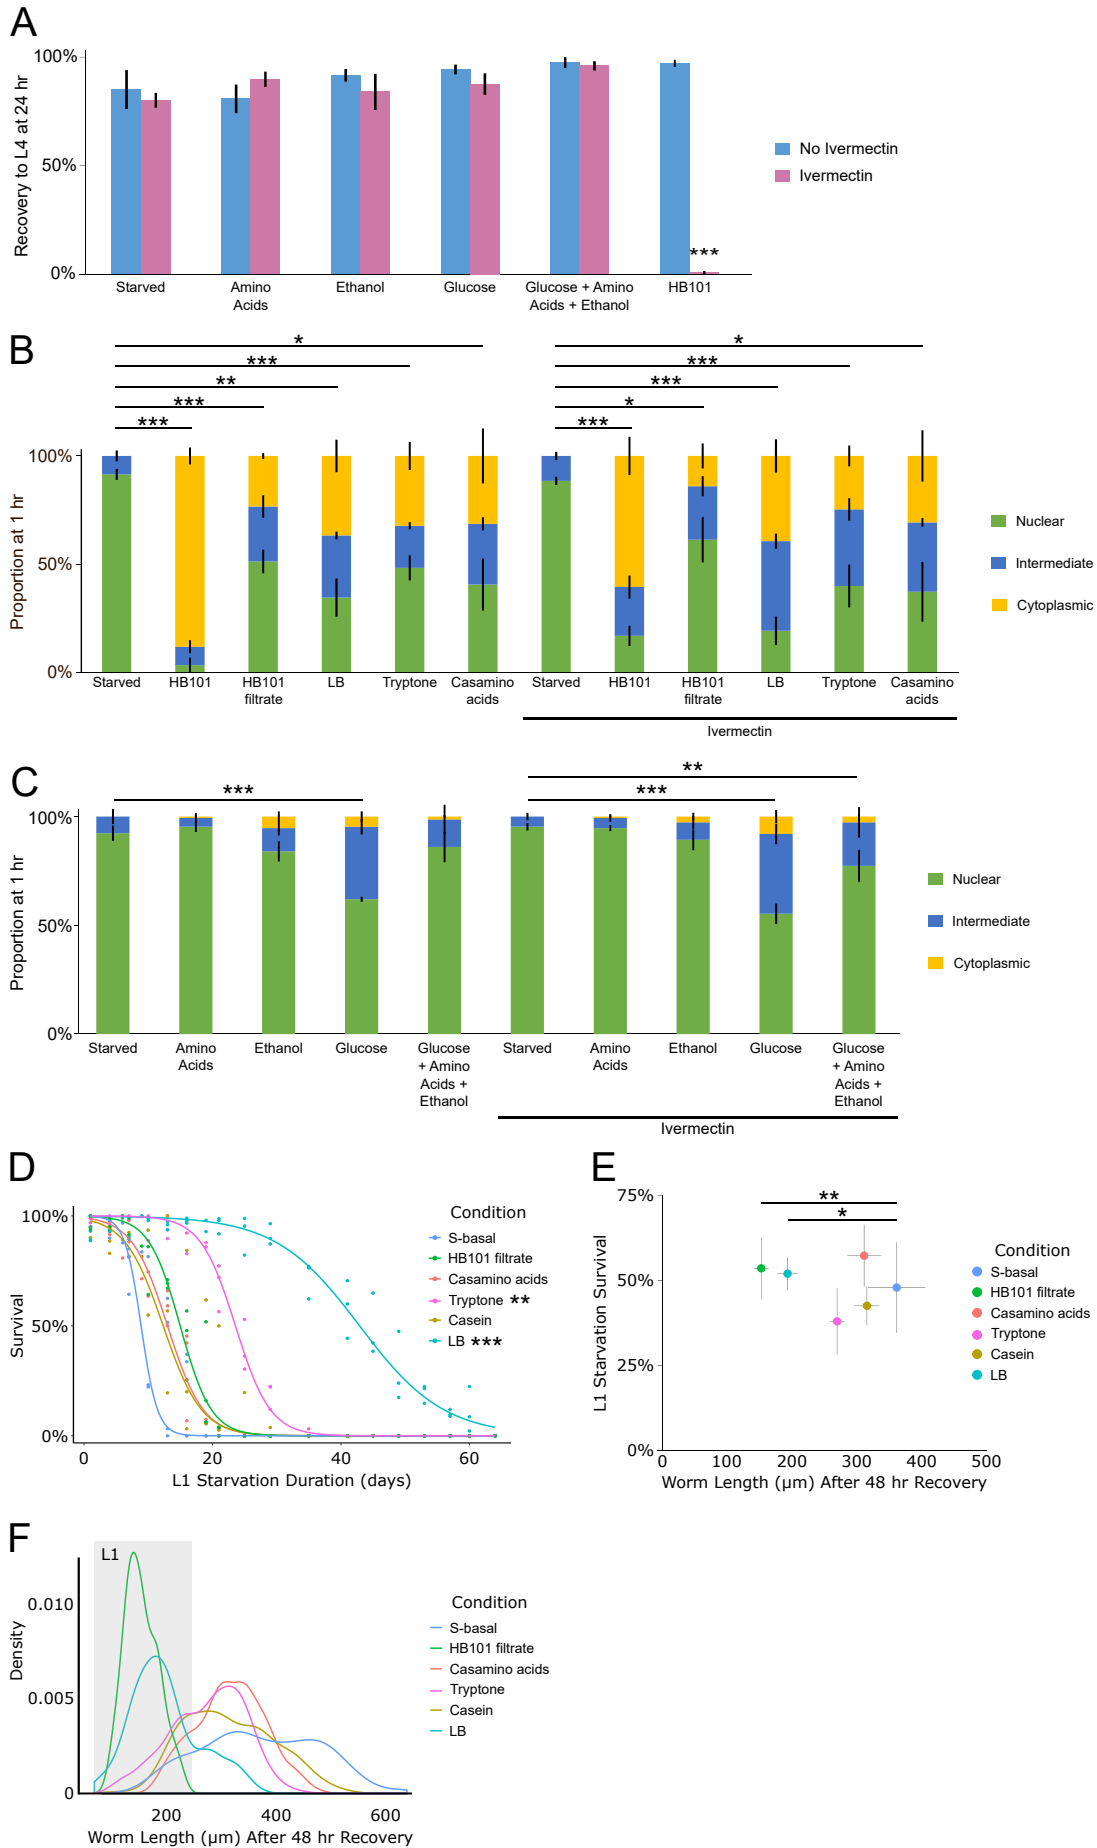

Source: http://biorxiv.org/content/10.1101/341883v1.full.pdf
